# Supplementary material for: NET silencing by let-7i in postural tachycardia syndrome
Source: JCI journal article supplement (doi:10.1172/jci.insight.90183), 2017-03-22
Supplement: sd1 [file 1]

## **Supplementary Figures**

Supplementary figure legends appear on the same page as the corresponding figures.

### Supplementary Figure 1

*NET* gene on Chromosome 16 (q12.2): 55689225-55691050

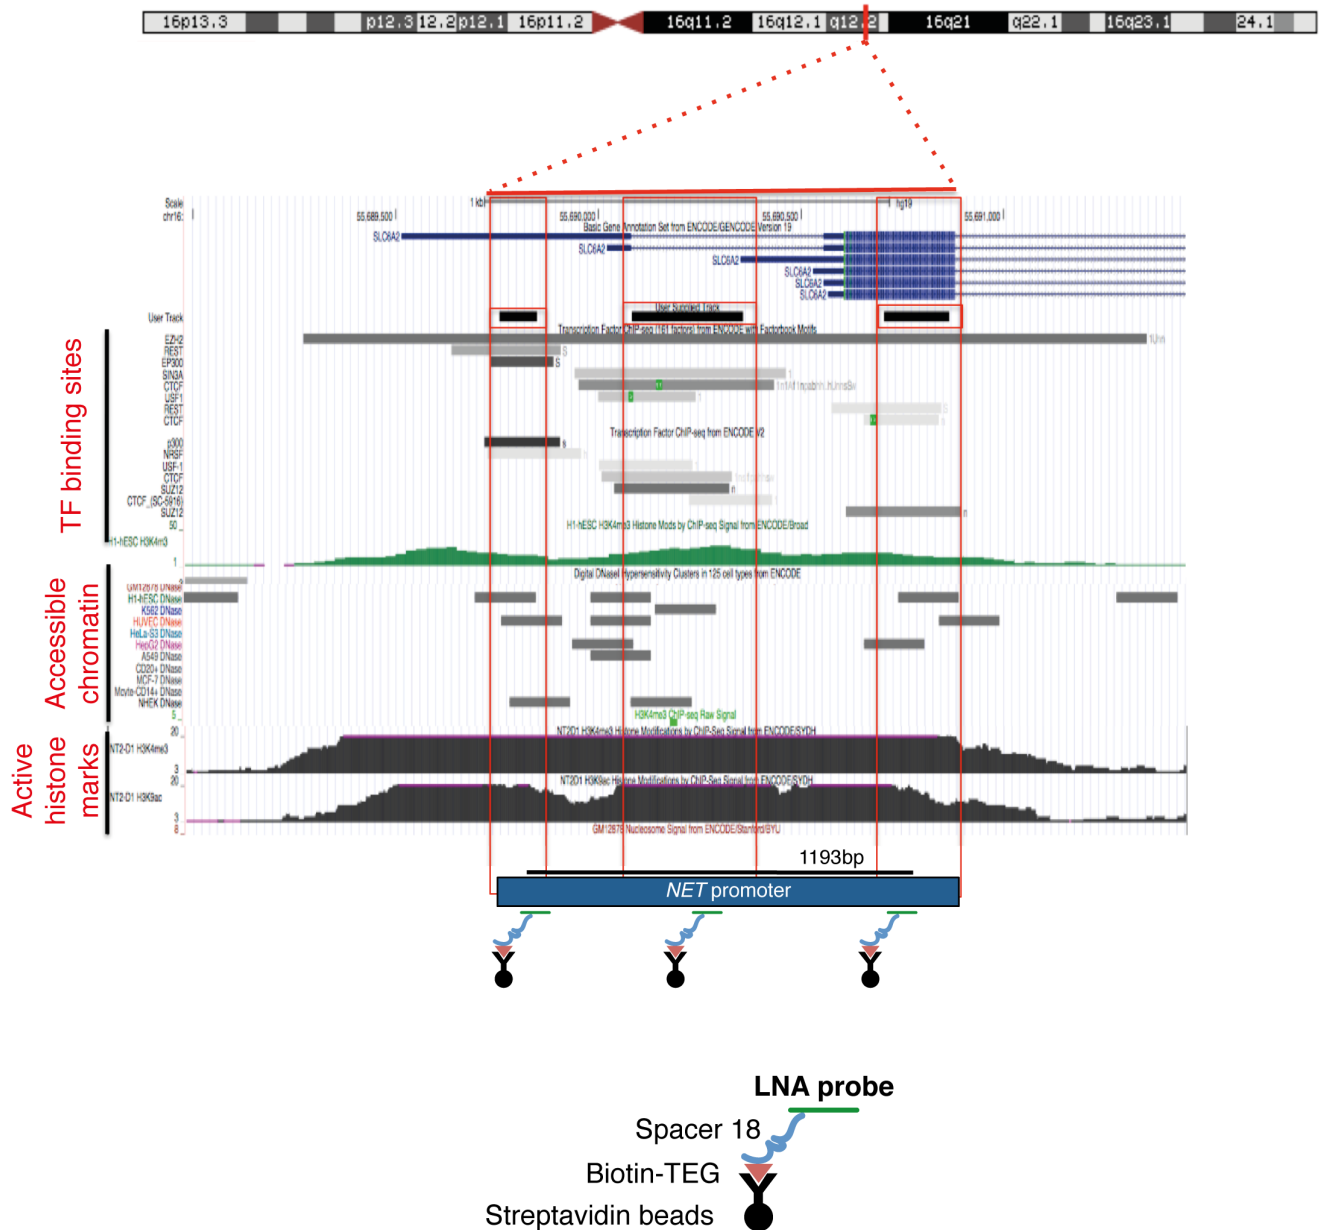

**Supplementary Figure 1. Design of *NET* specific LNA probes for RNA of Isolated Chromatin (RICh) **assay**.** Probe design for the *NET* promoter was based on the ENCODE project dataset for transcription factor binding sites, chromatin accessibility and active histone marks such as H3K4me3 and H3K9ac. We used a combination of three specific *NET* probes to capture 1193 bp fragment.

## Supplementary Figure 2

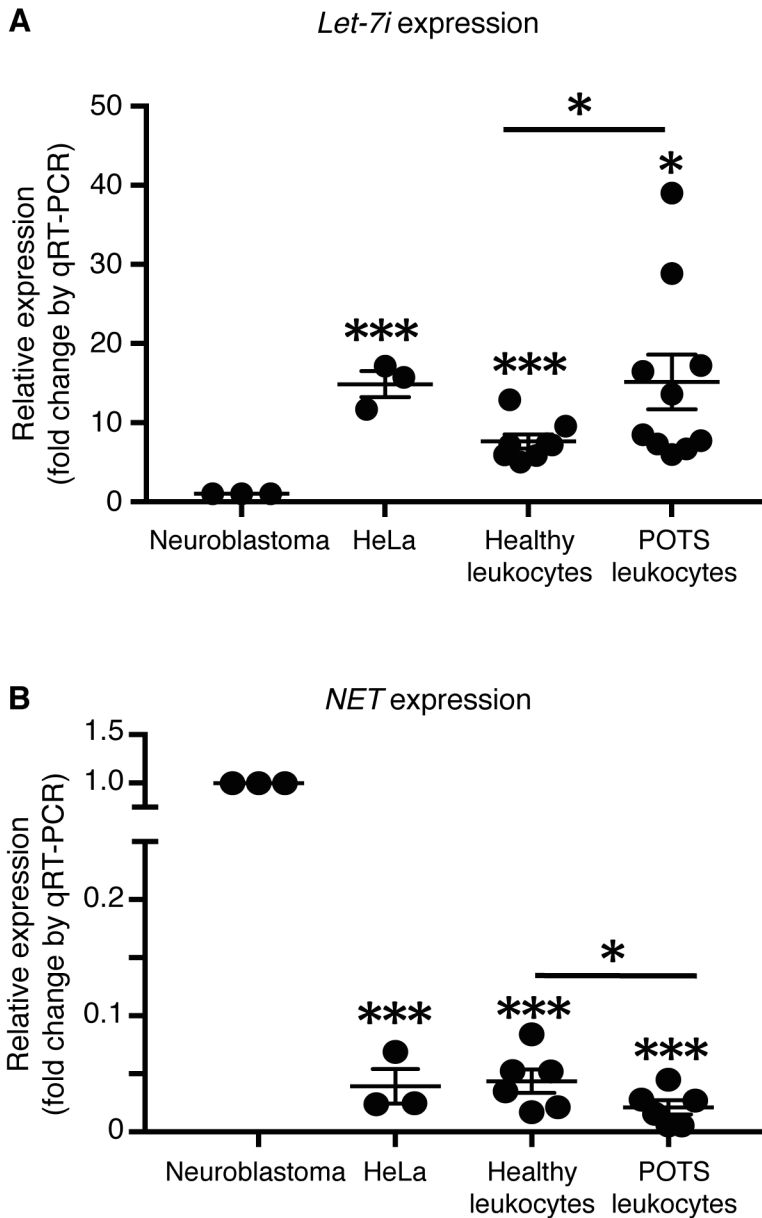

### Supplementary Figure 2. *NET* and *let-7i* gene expression in primary and non-primary cells.

(A) *Let-7i* expression in neuroblastoma cells SK-N-BE (2), HeLa, and leukocytes isolated from healthy and POTS participants; n=9. Relative expression is measured against *U6-2* using qRT-PCR. (B) *NET* expression in neuroblastoma cells SK-N-BE (2), HeLa, and leukocytes isolated from healthy and POTS participants; n=9. Relative expression is measured against *ACTB* using qRT-PCR. t test \* $P < 0.05$ , \*\* $P < 0.01$ , error bars represent mean  $\pm$  SEM.

### Supplementary Figure 3

*NET* gene on Chromosome 16 (q12.2): 55689225-55691050

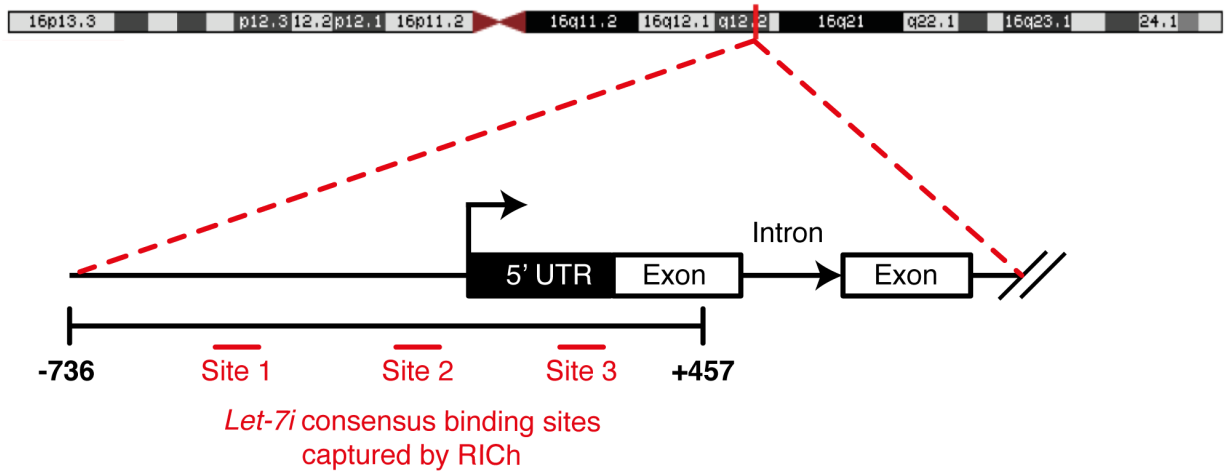

| <i>Let-7i</i> binding sites | Sequence homology                                                                                                                                                                     | Site location | Minimum free energy (mfe) Kcal/mol |
|-----------------------------|---------------------------------------------------------------------------------------------------------------------------------------------------------------------------------------|---------------|------------------------------------|
| Site 1                      | ( <i>NET</i> ):    _ _ G G G C G C A G G C T A C A U T A C C A<br>                               <br>( <i>let-7i</i> ): U U G U C G U G U U U G A U G _ _ A U G G A G U               | -488 to -468  | -27.7                              |
| Site 2                      | ( <i>NET</i> ):    T C G G C A C _ _ G C T G C C C T C A G C C T C G<br>                               <br>( <i>let-7i</i> ): U U G U C G U G U U U G A U G A _ _ _ _ U G G A G U     | -108 to -86   | -25.8                              |
| Site 3                      | ( <i>NET</i> ):    C G C G G G A C A G G G C T A G G U C T G C C T G G G<br>                               <br>( <i>let-7i</i> ): U U G U C G U G U _ U U G A U _ _ _ G A U G G A G U | +165 to +185  | -23.9                              |

### Supplementary Figure 3. *Let-7i* consensus binding sites at *NET* promoter.

Above schematic of the *NET* promoter (-736 to +457) represents the chromatinized region captured using the RICH-assay. Red regions numbered 1-3 represent the *let-7i* binding sites using the RNA hybrid prediction tool. The table shows *NET* sequence homology with *let-7i* locations and calculated minimum free energy (mfe).

# Supplementary Figure 4

*NET* gene on Chromosome 16 (q12.2): 55689225-55691050

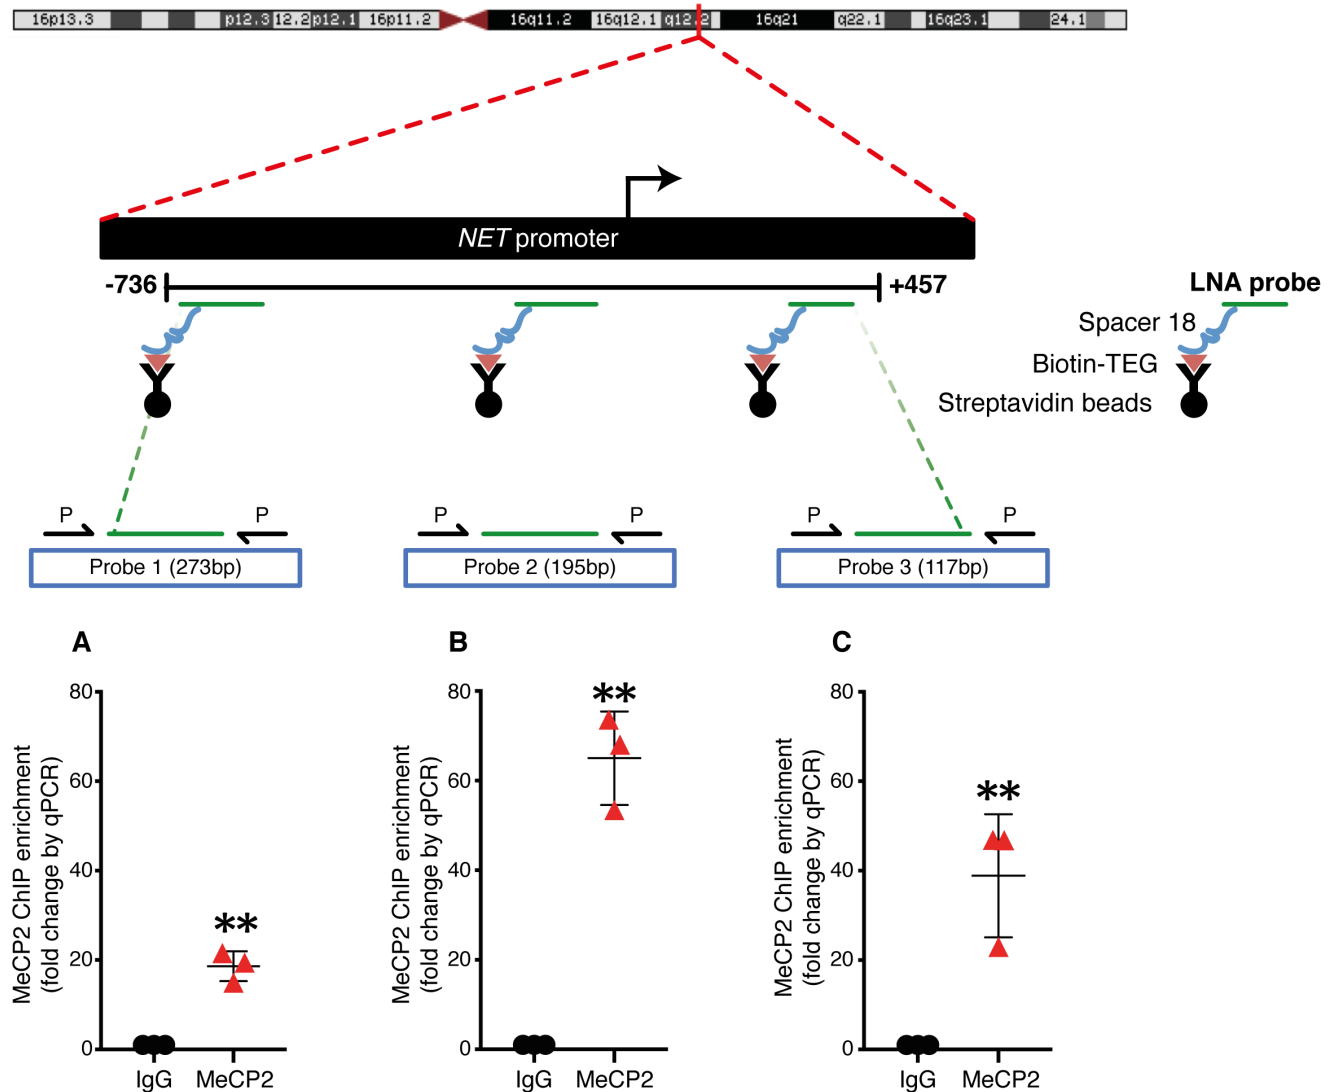

## Supplementary Figure 4. MeCP2 binds at the LNA probe sequences of the human *NET* promoter.

ChIP assay confirms MeCP2 interacts at the LNA binding sites of the *NET* promoter using primers specific for (A) probe 1, (B) probe 2, and (C) probe 3 in HeLa cells. Primers in schematic are abbreviated as P. n=3. t test \* $P < 0.05$ , \*\* $P < 0.01$ ; error bars represent SD.

**Supplementary Figure 5.**

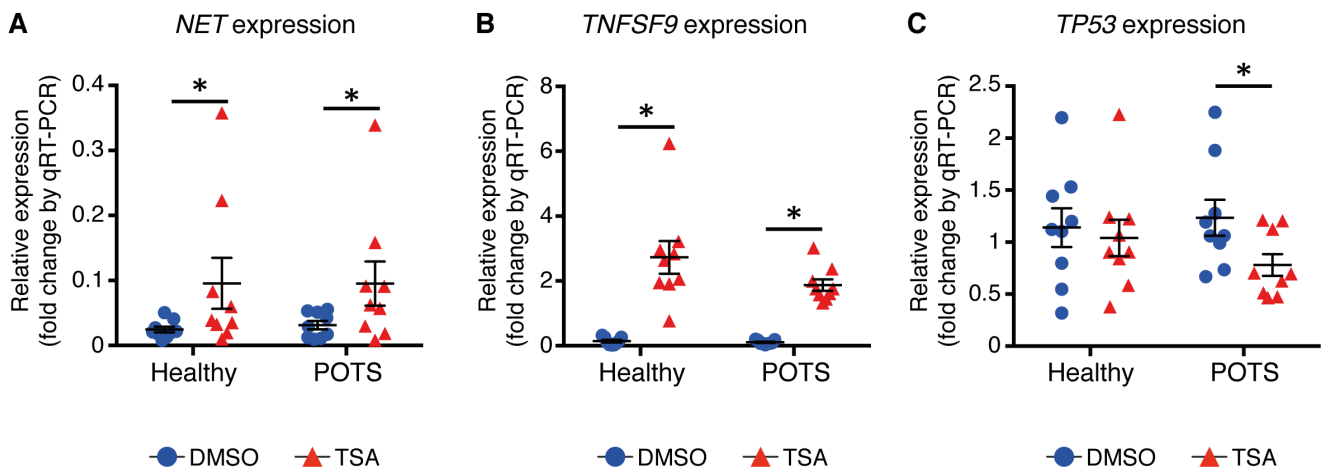

**Supplementary Figure 5. *Ex-vivo* TSA stimulation reactivates *NET* expression in leukocytes derived from healthy and POTS participants.**

(A) Increased *NET* expression following TSA stimulation of leukocytes derived from healthy and POTS participants. Relative expression is measured against *ACTB* using qRT-PCR. (B) Increased *TNFSF9* expression following TSA stimulation of leukocytes derived from healthy and POTS participants. Relative expression is measured against *ACTB* using qRT-PCR. (C) *TP53* expression following TSA stimulation of leukocytes derived from healthy and POTS participants.  $n=9$ . Relative expression is measured against *ACTB* using qRT-PCR.  $t$  test  $*P < 0.05$ ,  $**P < 0.01$ ; error bars represent mean  $\pm$  SEM.

**Supplementary Table 1** Small RNA alignment metrics

| <b>Sample</b>       | <b>Total reads</b> | <b>Mapped</b> | <b>Uniquely mapped</b> |
|---------------------|--------------------|---------------|------------------------|
| Input 1             | 710967             | 87.12%        | 36566                  |
| Input 2             | 797949             | 92.22%        | 291685                 |
| Input 3             | 974187             | 88.90%        | 321321                 |
| <i>NET</i> -probe 1 | 192232             | 84.21%        | 57030                  |
| <i>NET</i> -probe 2 | 896197             | 89.32%        | 202672                 |
| <i>NET</i> -probe 3 | 93600              | 80.88%        | 22291                  |
| Scramble 1          | 115790             | 76.11%        | 19633                  |
| Scramble 2          | 156110             | 69.47%        | 27232                  |
| Scramble 3          | 203515             | 81.39%        | 44224                  |

**Supplementary Table 2**

| Gene name       | Ensemble ID     | Gene biotype   | Gene location                | Abundance (rank) | Log FC (input) | FDR (input) | Log FC (scr) | FDR (scr)  |
|-----------------|-----------------|----------------|------------------------------|------------------|----------------|-------------|--------------|------------|
| <i>MIRLET7I</i> | ENSG00000199179 | miRNA          | chr12:6260368<br>6-62603769  | Top 10%          | 2.49           | 0.000012    | 4.32         | 0.00000001 |
| <i>SNORD94</i>  | ENSG00000208772 | snoRNA         | chr2:86135870-<br>86136006   | Top 15%          | 1.30           | 0.000004    | 3.21         | 0.00000152 |
| <i>SNORA46</i>  | ENSG00000207493 | snoRNA         | chr16:5854849<br>9-58548633  | Top 20%          | 2.01           | 0.001550    | 4.74         | 0.00000152 |
| <i>SCARNA4</i>  | ENSG00000252808 | snoRNA         | chr1:15589574<br>9-155895877 | Top 25%          | 1.82           | 0.001498    | 2.90         | 0.00007441 |
| <i>TUFM</i>     | ENSG00000178952 | protein coding | chr16:2884241<br>1-28846408  | Top 25%          | 2.06           | 0.001550    | 2.35         | 0.00656122 |

**Supplementary Table 2. Summary of RNAs identified by RICH-seq at the *NET* promoter**

Chromatin bound RNA transcripts at the *NET* promoter. These transcripts were common in two different methods to analyse RICH-seq data. In method one, the abundance of transcripts using the *NET*-probe is compared to input (total chromatin RNAs). In the second method the abundance of transcripts using the *NET*-probe is compared to scramble (scr) probe. False Discover Rate (FDR) and Log fold changes (Log FC).
